# Supplementary material for: Identification of Chromoblastomycosis and Phaeohyphomycosis Agents through ITS-RFLP
Source: MDPI journal article supplement (doi:10.3390/jof10020159), 2024-02-18
Supplement: s1 [file s1]

**Table S1:** Sequences used in the in silico analyses and Genbank code access.

| Genbank Access | Species                          |
|----------------|----------------------------------|
| MF416923.1     | <i>Fonsecaea pedrosoi</i>        |
| MF416922.1     | <i>Fonsecaea pedrosoi</i>        |
| MF416919.1     | <i>Fonsecaea pedrosoi</i>        |
| KY312537.1     | <i>Fonsecaea pedrosoi</i>        |
| KY312536.1     | <i>Fonsecaea pedrosoi</i>        |
| KY312535.1     | <i>Fonsecaea pedrosoi</i>        |
| KY312533.1     | <i>Fonsecaea pedrosoi</i>        |
| KY312532.1     | <i>Fonsecaea pedrosoi</i>        |
| KY312531.1     | <i>Fonsecaea pedrosoi</i>        |
| KY312529.1     | <i>Fonsecaea pedrosoi</i>        |
| KY312528.1     | <i>Fonsecaea pedrosoi</i>        |
| KY312526.1     | <i>Fonsecaea pedrosoi</i>        |
| KY312525.1     | <i>Fonsecaea pedrosoi</i>        |
| KY312524.1     | <i>Fonsecaea pedrosoi</i>        |
| KY312523.1     | <i>Fonsecaea pedrosoi</i>        |
| NR_130652.1    | <i>Fonsecaea pedrosoi</i>        |
| KP132210.1     | <i>Fonsecaea pedrosoi</i>        |
| KP132209.1     | <i>Fonsecaea pedrosoi</i>        |
| KP132205.1     | <i>Fonsecaea pedrosoi</i>        |
| KC709978.1     | <i>Fonsecaea pedrosoi</i>        |
| MF416924.1     | <i>Fonsecaea monophora</i>       |
| MF416920.1     | <i>Fonsecaea monophora</i>       |
| KY312538.1     | <i>Fonsecaea monophora</i>       |
| KY312534.1     | <i>Fonsecaea monophora</i>       |
| NR_131280.1    | <i>Fonsecaea monophora</i>       |
| MH382070.1     | <i>Fonsecaea monophora</i>       |
| MH382069.1     | <i>Fonsecaea monophora</i>       |
| MH382068.1     | <i>Fonsecaea monophora</i>       |
| MH382067.1     | <i>Fonsecaea monophora</i>       |
| MH382066.1     | <i>Fonsecaea monophora</i>       |
| MH382065.1     | <i>Fonsecaea monophora</i>       |
| KP132197.1     | <i>Fonsecaea monophora</i>       |
| KP132193.1     | <i>Fonsecaea monophora</i>       |
| KC614700.1     | <i>Fonsecaea monophora</i>       |
| EU285272.1     | <i>Fonsecaea monophora</i>       |
| KY312527.1     | <i>Cladophialophora bantiana</i> |
| KY432483.1     | <i>Cladophialophora bantiana</i> |
| KP131826.1     | <i>Cladophialophora bantiana</i> |
| KP131825.1     | <i>Cladophialophora bantiana</i> |
| KP131824.1     | <i>Cladophialophora bantiana</i> |
| AY366924.1     | <i>Cladophialophora bantiana</i> |
| AF131079.1     | <i>Cladophialophora bantiana</i> |
| MH094277.1     | <i>Cladophialophora bantiana</i> |
| KY312530.1     | <i>Exophiala dermatitidis</i>    |

|             |                                   |
|-------------|-----------------------------------|
| NR_121268.1 | <i>Exophiala dermatitidis</i>     |
| KP132044.1  | <i>Exophiala dermatitidis</i>     |
| KP132043.1  | <i>Exophiala dermatitidis</i>     |
| KP132042.1  | <i>Exophiala dermatitidis</i>     |
| KP132041.1  | <i>Exophiala dermatitidis</i>     |
| KP132040.1  | <i>Exophiala dermatitidis</i>     |
| NR_121267.1 | <i>Cladophialophora carrionii</i> |
| MK820048.1  | <i>Cladophialophora carrionii</i> |
| MK820047.1  | <i>Cladophialophora carrionii</i> |
| MK820046.1  | <i>Cladophialophora carrionii</i> |
| NR_155089.1 | <i>Fonsecaea pugnacius</i>        |
| MH444809.1  | <i>Fonsecaea pugnacius</i>        |
| KR706554.1  | <i>Fonsecaea pugnacius</i>        |
| NR_111333.1 | <i>Fonsecaea nubica</i>           |
| KY432481.1  | <i>Fonsecaea nubica</i>           |
| AY366931.1  | <i>Fonsecaea nubica</i>           |
