# Supplementary material for: Identification of Chromoblastomycosis and Phaeohyphomycosis Agents through ITS-RFLP
Source: MDPI journal article supplement (doi:10.3390/jof10020159), 2024-02-18
Supplement: s1 [file s1]

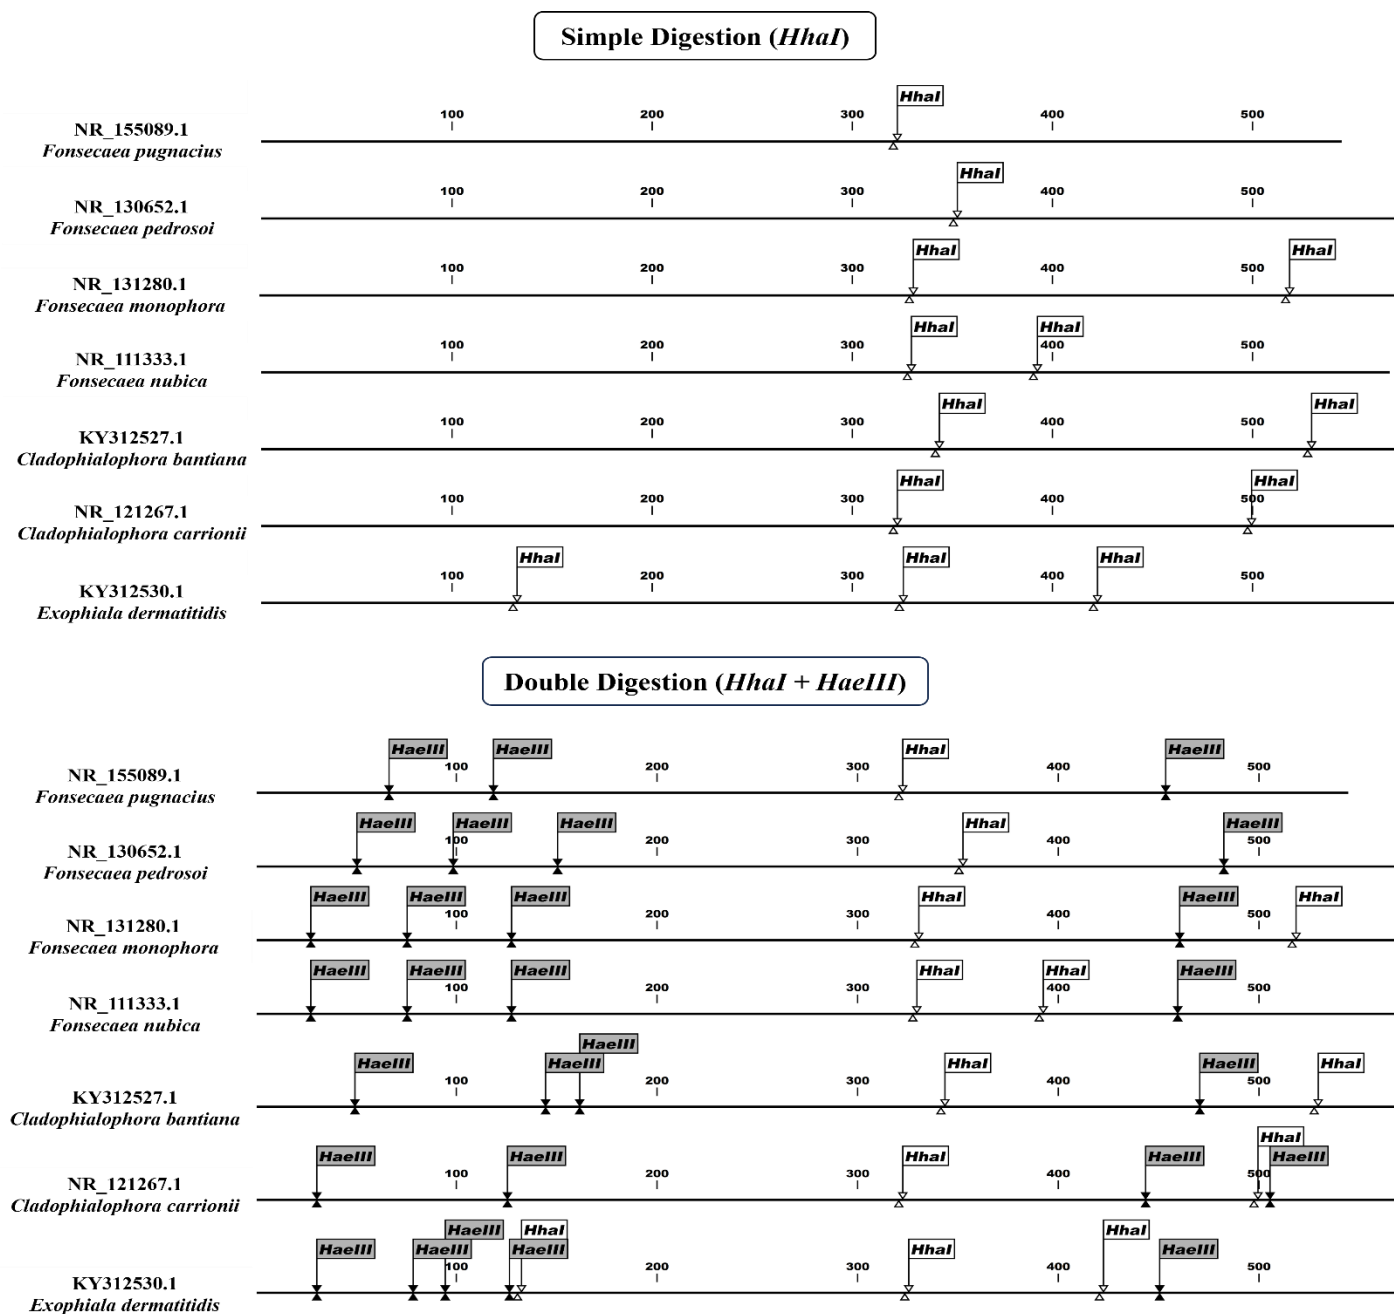

**Figure S1:** In silico analysis with sequences from less prevalent agents of chromoblastomycosis.
